# Supplementary material for: Convenient synthesis of carbon nanodots for detecting Cr(vi) and ascorbic acid by fluorimetry
Source: Royal Society of Chemistry journal article supplement (doi:10.1039/d0nj04495d), 2020-01-01
Supplement: d0nj04495d1.pdf [file d0nj04495d1.pdf]

## **A convenient synthesis of carbon nanodots applied to detect Cr (VI) and ascorbic acid by fluorimetry**

Captions to figures:

Fig.S1 Effects of the reaction (a) temperature and (b) time on the fluorescence of CDs.

$C_{\text{CDs}}=0.168 \text{ mg/mL}$

Fig.S2 XRD profile of CDs.

Fig.S3 UV-vis absorption, excitation (emission at 460 nm), and emission (excited at 337 nm) spectra of the synthesized CDs

Fig.S4 (a) Effect of pH; (b) the amount of buffer on the fluorescent intensity of CDs; (c) fluorescence responses of the CDs in the presence of different concentrations (0.1, 0.5, 1.0, 2.0, 3.0 M) of NaCl; (d) concentrations of  $\text{H}_2\text{O}_2$  (1, 10, 100, 200, 300 mM) and (e) different storage times on the fluorescent intensity.  $C_{\text{CDs}}=0.168 \text{ mg/mL}$

Fig.S5 (a) Effects of the pH and (b) reaction time to fluorescence intensity of CDs and Cr(VI).  $C_{\text{CDs}}=0.168 \text{ mg/mL}$ ,  $C_{\text{Cr(VI)}}=40 \text{ }\mu\text{mol/L}$ .

Fig.S6 Zeta potential distribution diagram of CDs (a) and CDs/Cr (VI) (b).

Fig.S7 UV-vis absorption spectra of CDs/Cr(VI) in the presence of different concentrations of AA. (Inset: the amplified absorption spectra of main spectra).

Fig.S8 (a) Fluorescence intensity of CDs in the presence of different micromolecule and amino acids (Concentrations are  $1.0 \text{ }\mu\text{mol/L}$ ). (b) fluorescence recovery time of AA and CDs.  $C_{\text{CDs}}=0.168 \text{ mg/mL}$ ,  $C_{\text{Cr(VI)}}=2.6 \text{ mg/mL}$ .

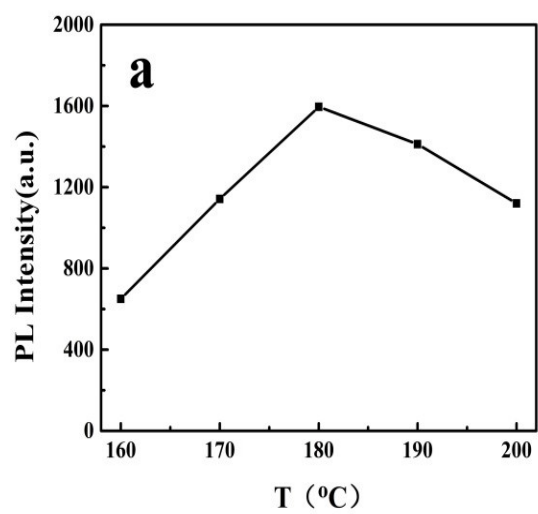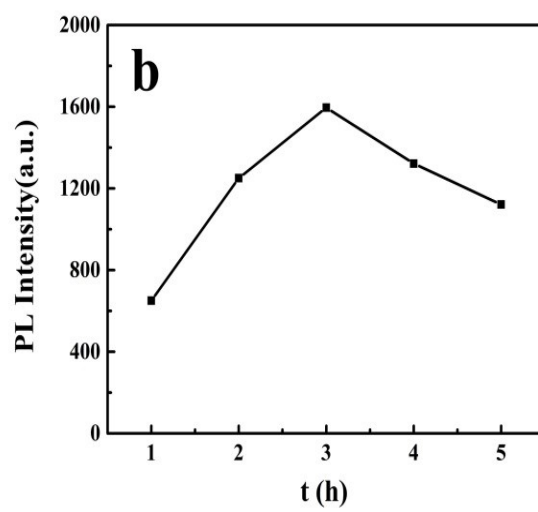

Fig.S1

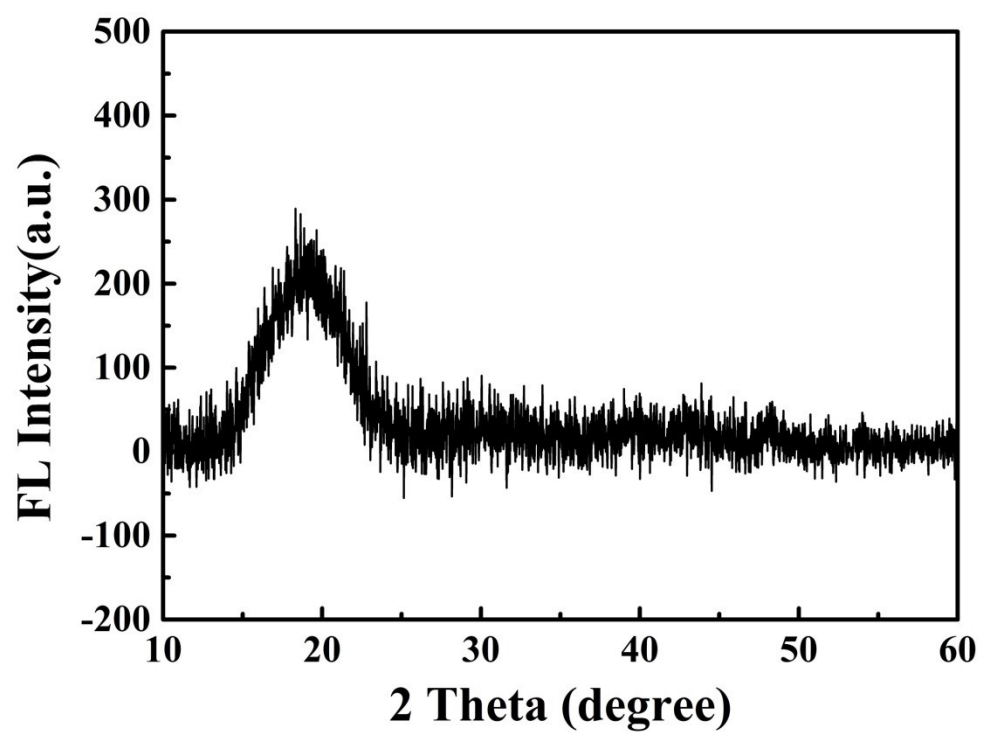

Fig.S2

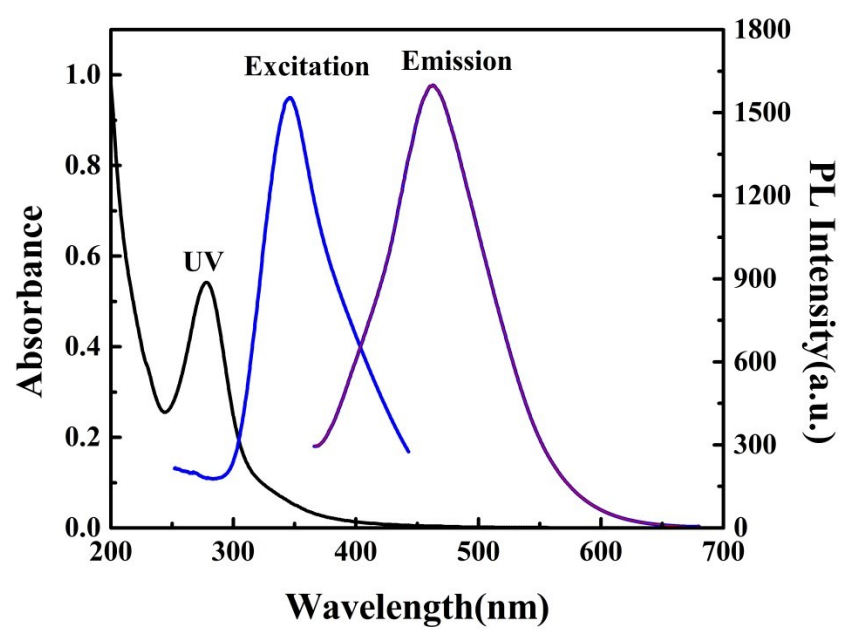

Fig.S3

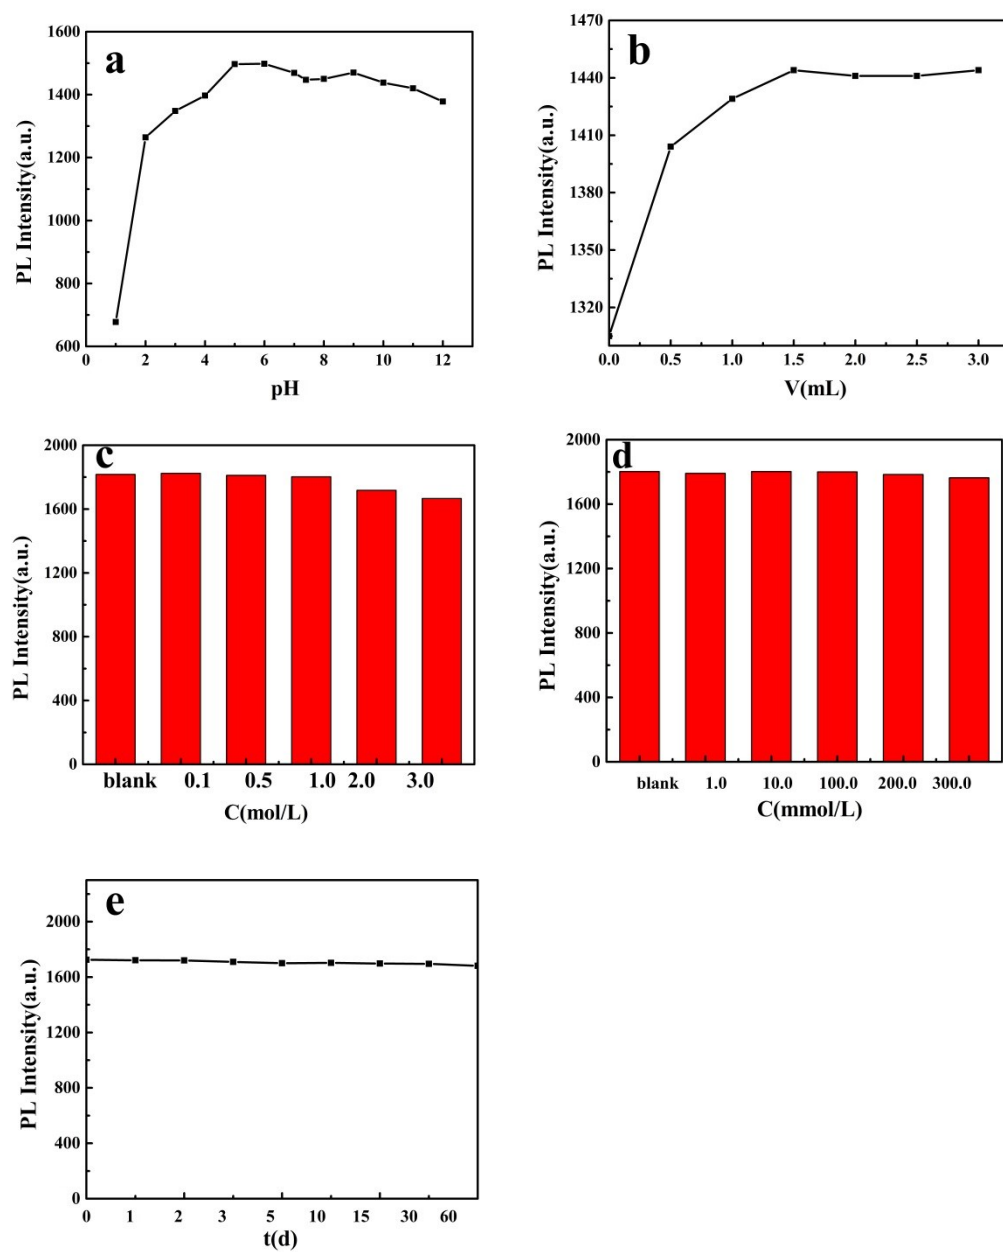

Fig.S4

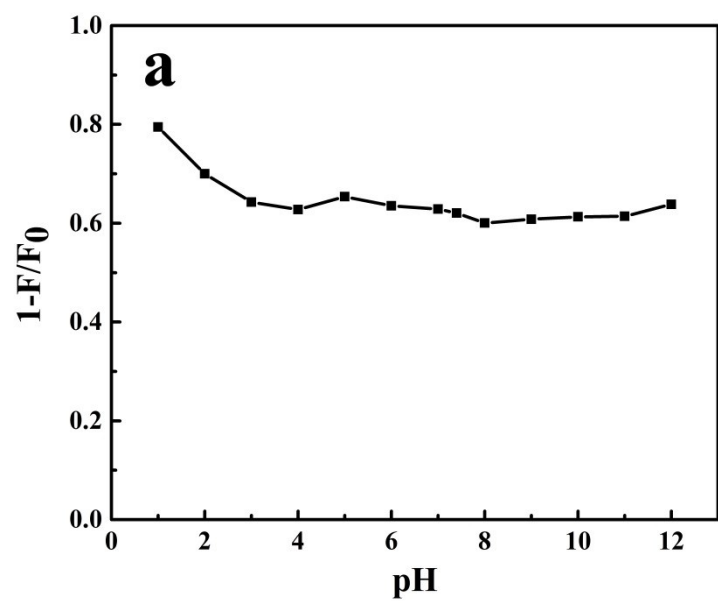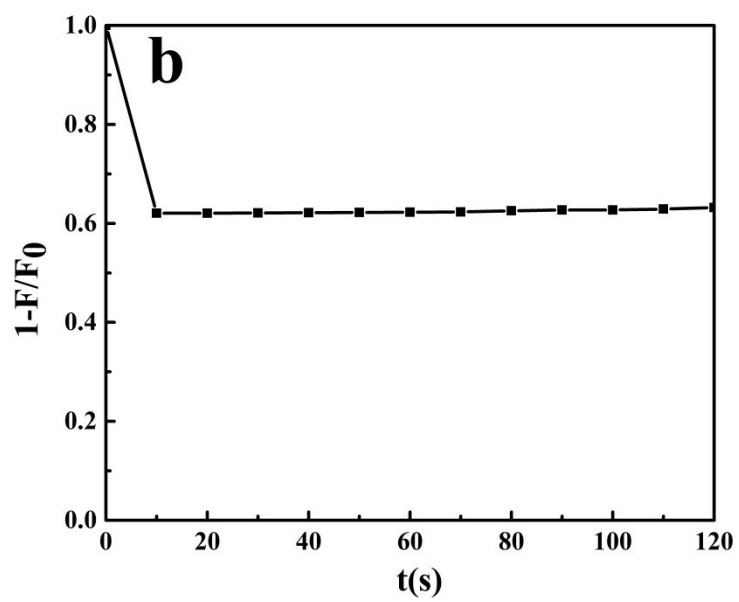

Fig.S5

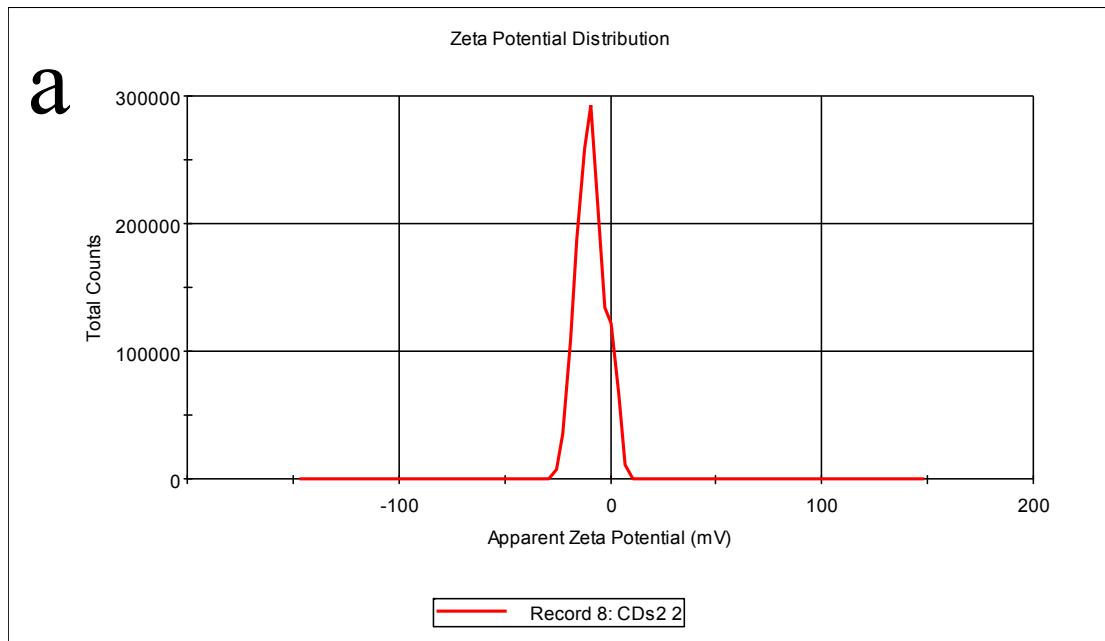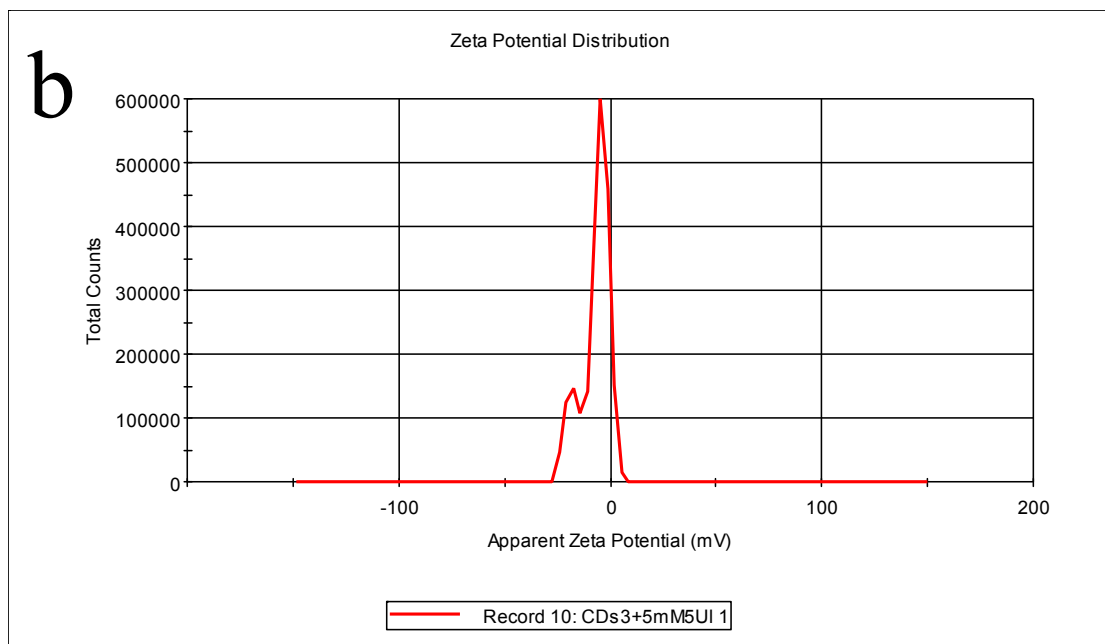

Fig.S6

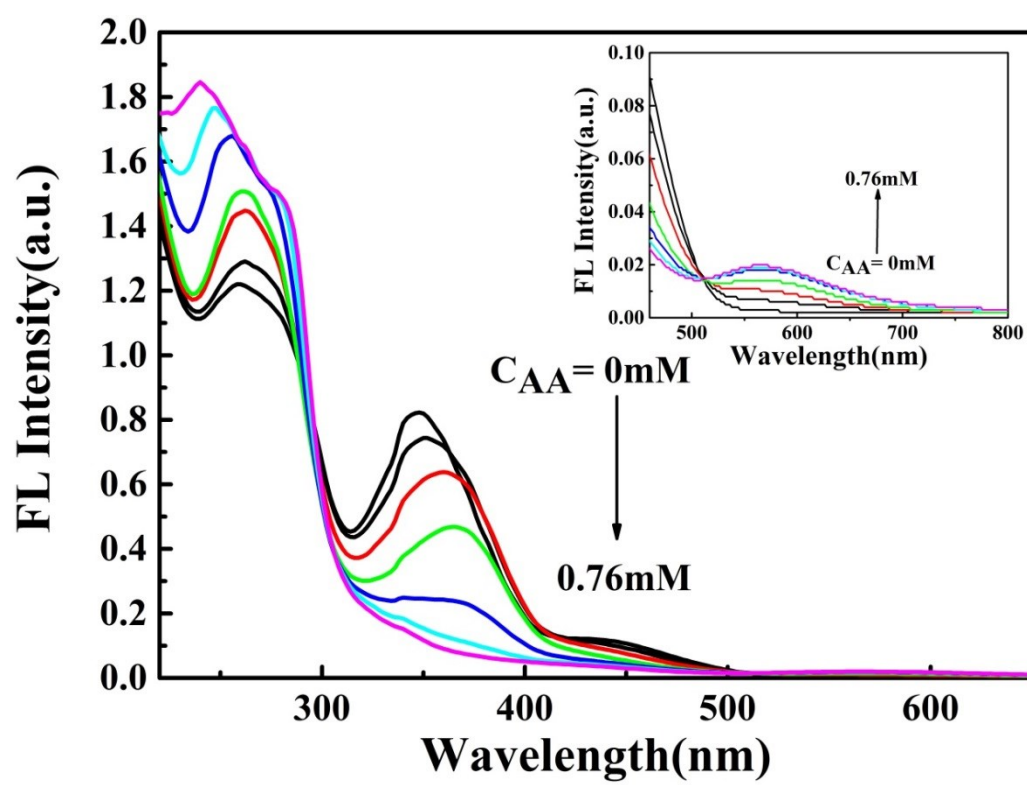

Fig.S7



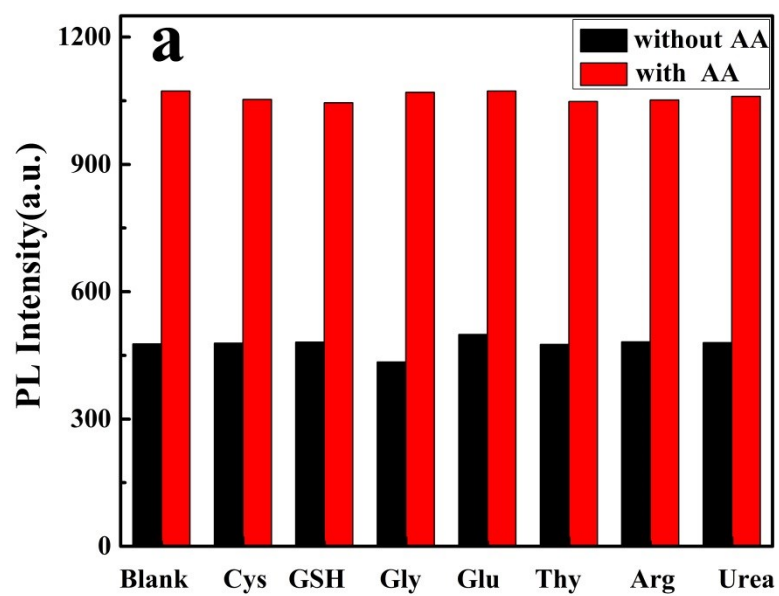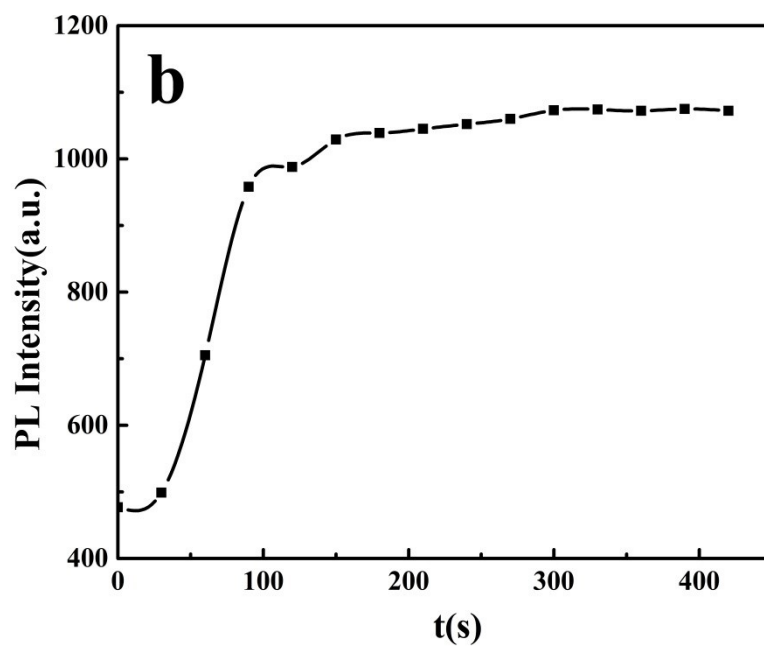

Fig.S8
